# Supplementary material
Source: Springer Nature journal article supplement (https://www.springermedizin.de/resource/supplementary/12974_2009_198_MOESM2_ESM.pdf/9600980)

**A**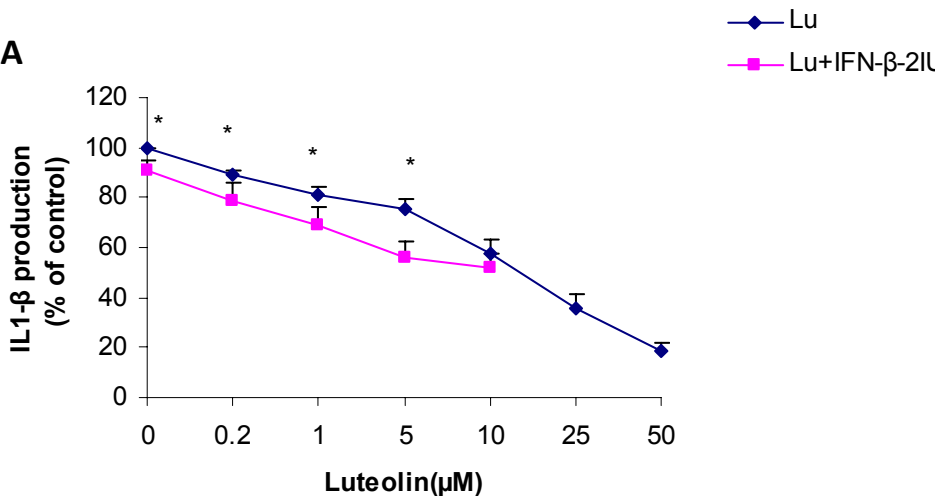**B**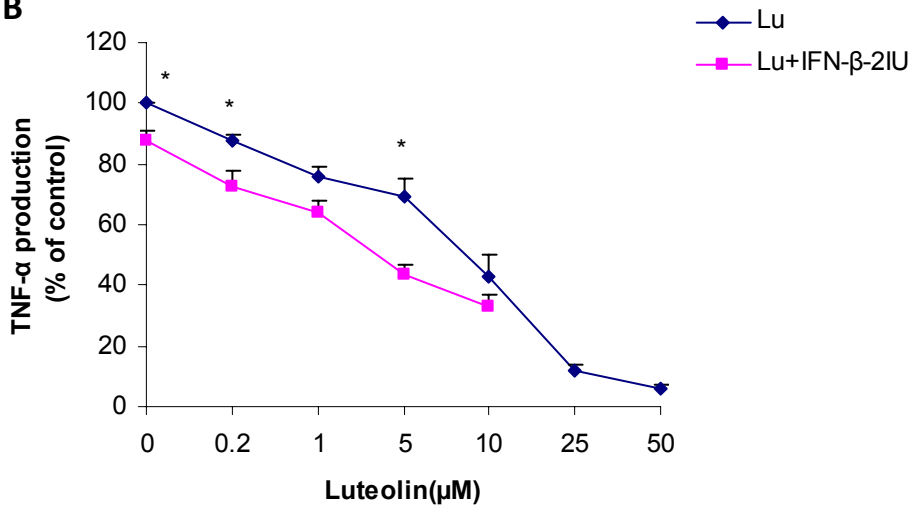

Supplement: MOESM2 [file 9600980]
